# Supplementary material for: Structural basis of FANCD2 deubiquitination by USP1-UAF1
Source: bioRxiv or medRxiv preprint supplement (doi:10.1101/2020.12.05.412924), 2020-12-06
Supplement: Supplementary file [file media-4.pdf]

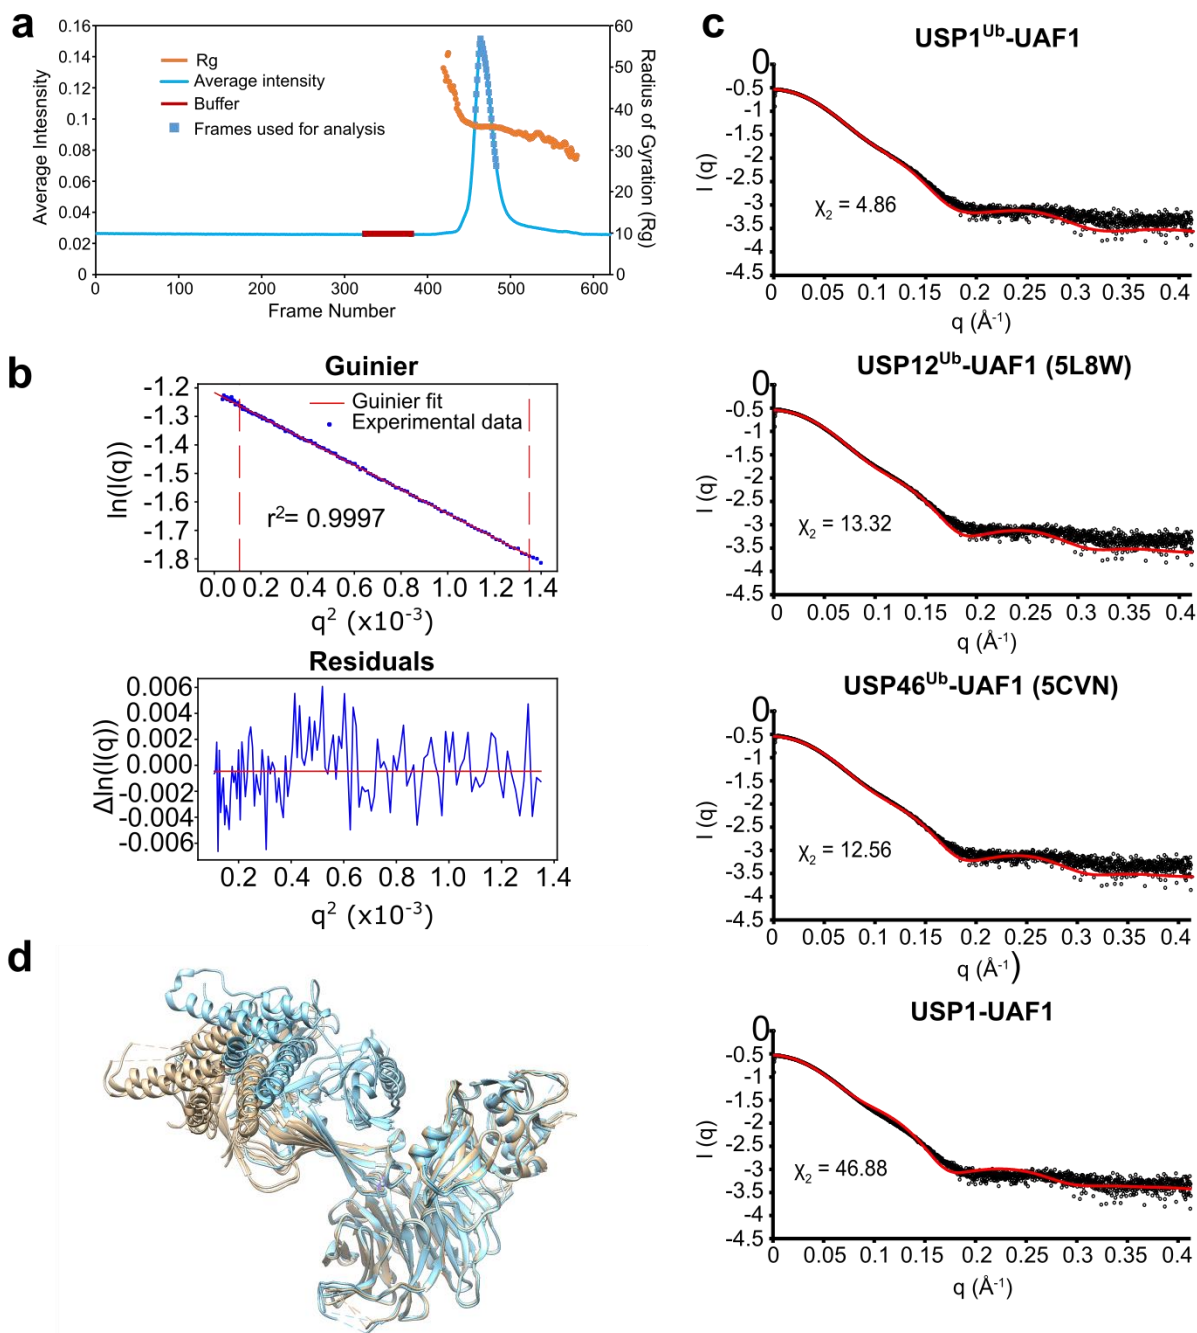

**Supplementary Figure S1.** Structural characterization of USP1-UAF1. **(a)** SEC-SAXS trace for the crystallized ubiquitin-bound USP1-UAF1 construct. **(b)** Guinier plot of buffer subtracted, averaged SAXS measurements. **(c)** Fit of different USP-UAF1 crystal structures to SAXS measurements. The better resolved chains A and B of the ubiquitin-free (USP1-UAF1) and chains A, B, and C (USP1<sup>Ub</sup>-UAF1) of the ubiquitin-bound structure were used for fitting. **(d)** The two USP1-UAF1 complexes in the asymmetric unit of the ubiquitin-free (brown) and ubiquitin-bound (blue) crystal structures aligned by UAF1. The

better resolved chains A and B of the ubiquitin-free (USP1-UAF1) and chains A, B, and C USP1<sup>Ub</sup>-UAF1) of the ubiquitin-bound structure were used for analysis unless otherwise stated.

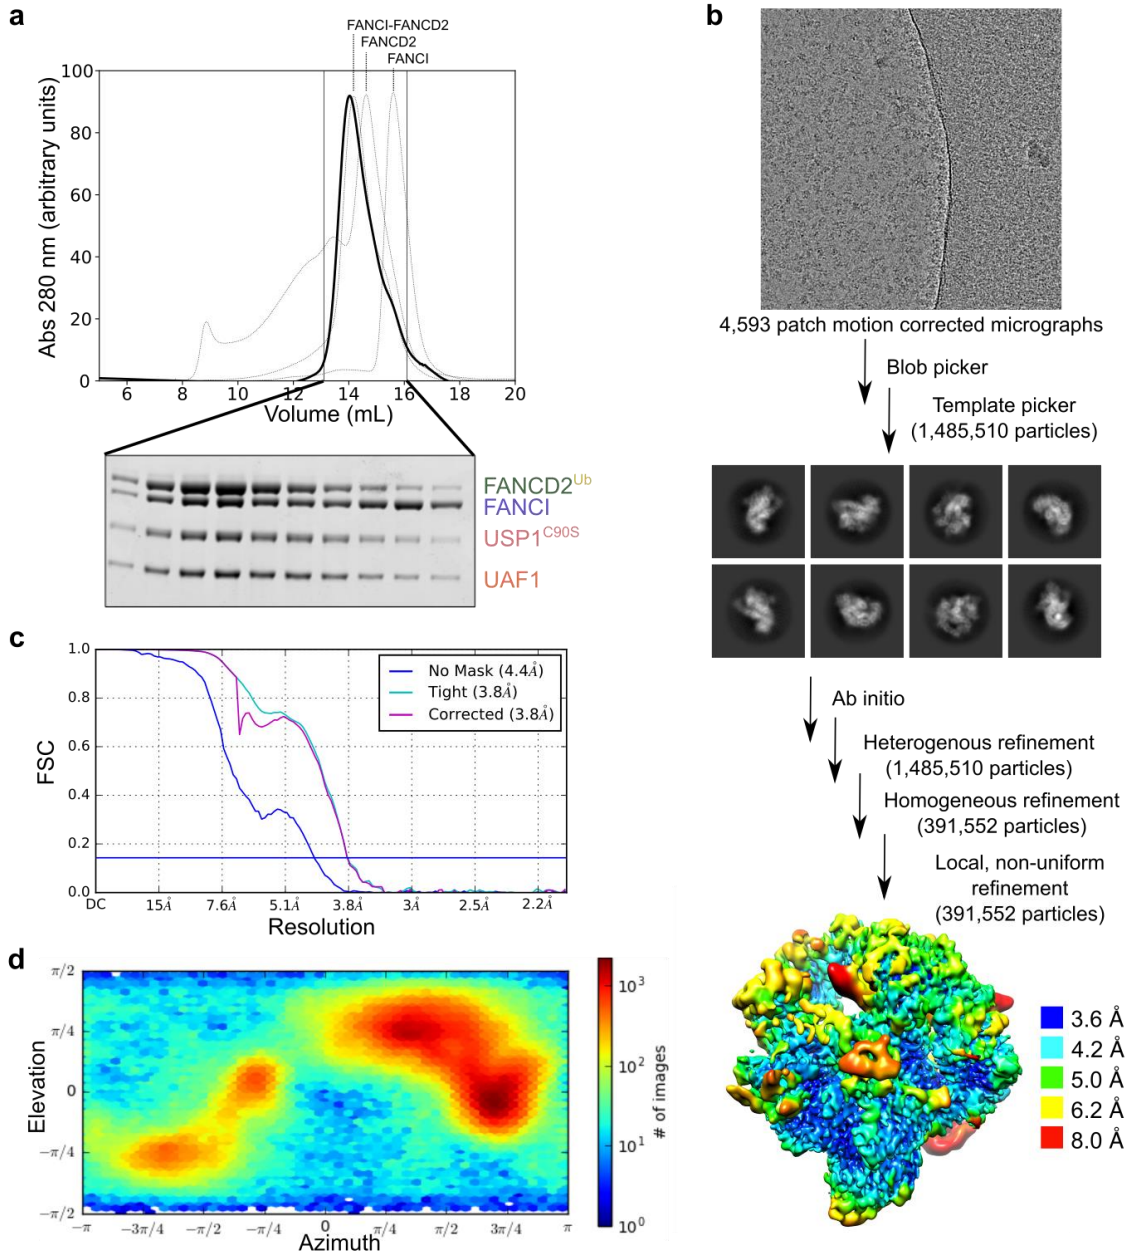

**Supplementary Figure S2.** Cryo-EM data processing. **(a)** Gel filtration profile of the assembled USP1<sup>C90S</sup>-UAF1-FANCI-FANCD2<sup>Ub</sup> complex and associated SDS-PAGE and Coomassie staining. **(b)** Flow diagram for analysis of the cryo-EM data by single particle analysis (see also Methods). The locally filtered map is

shown. (c) Unmasked, masked, and corrected Fourier Shell Correlation curves. (d) Viewing direction distribution.

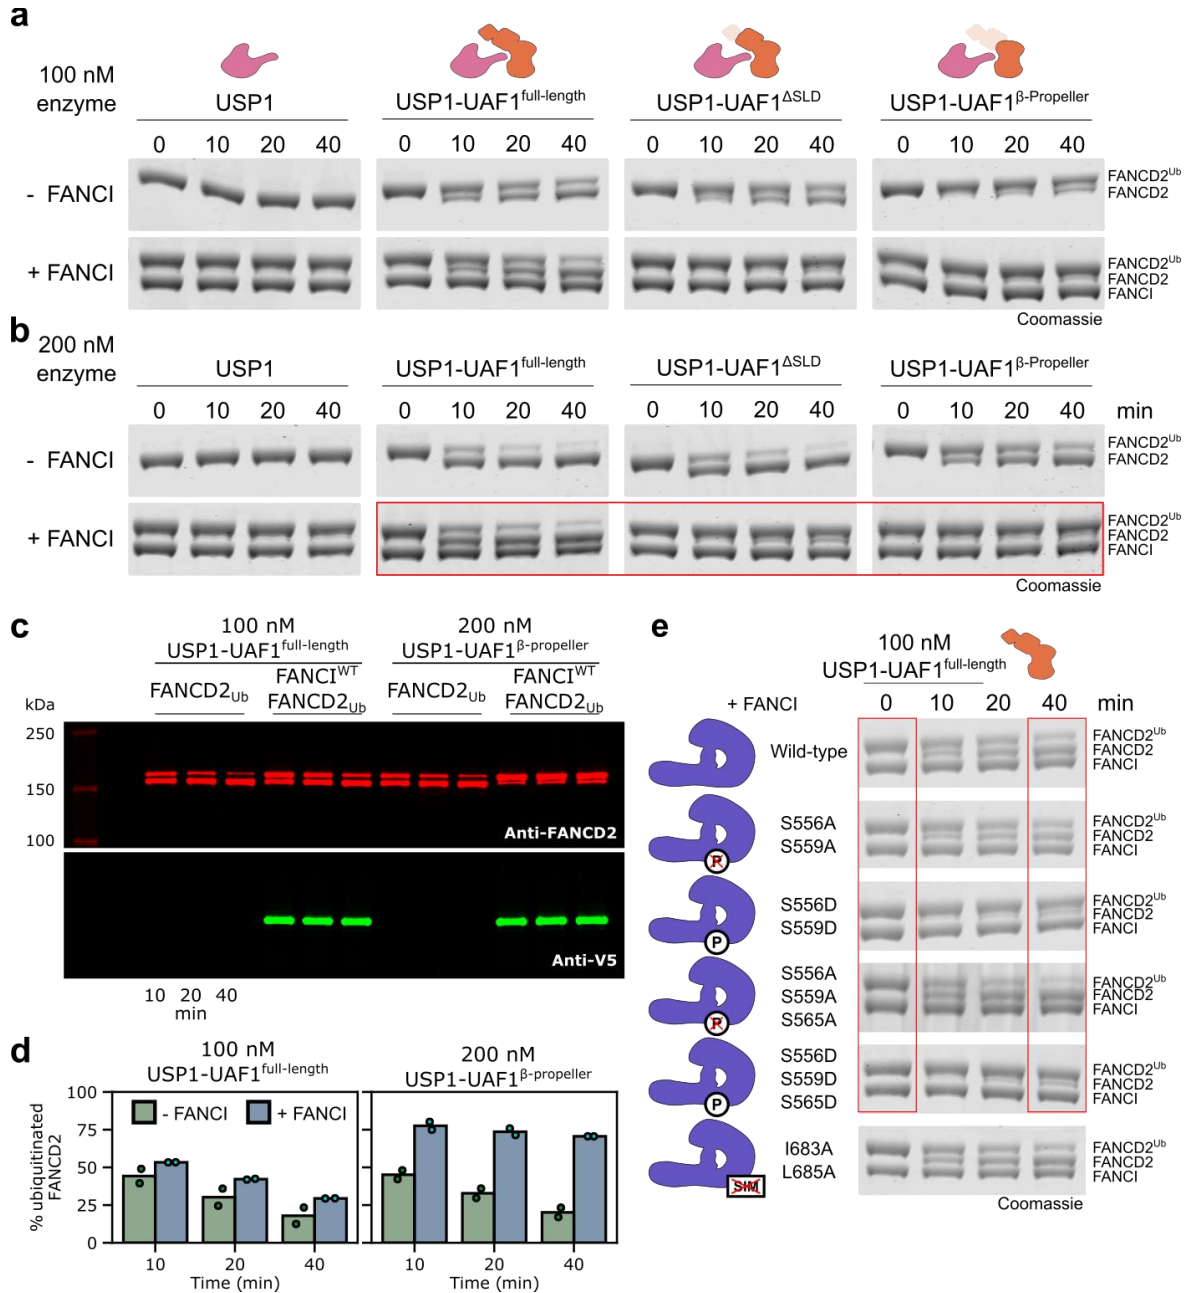

**Supplementary Figure S3.** Deubiquitination assays of FANCD2 by USP1-UAF1. (a) Deubiquitination time-courses for full-length USP1 alone and with the addition of various UAF1 truncations, at 100 nM USP1, 100 nM UAF1 as assessed by SDS-PAGE and Coomassie staining. (b) Deubiquitination time-courses for USP1 alone and with the addition of various UAF1 truncations, at 200 nM USP1, 200 nM UAF1 as

assessed by SDS-PAGE and Coomassie staining. (c) Deubiquitination time-courses as assessed by Western blot. (d) Quantification of Western blots. Mean values are represented as bars with the individual replicates shown as points. (e) Deubiquitination time-courses for full-length USP1 and full-length UAF1 with ubiquitinated FANCD2 and various FANCI mutants as assessed by SDS-PAGE and Coomassie staining. For all assays 1  $\mu$ M ubiquitinated FANCD2 was used, and 1  $\mu$ M FANCI were included. All assays were in the presence of 4  $\mu$ M 61 base pair dsDNA, and performed at least twice (two technical replicates). Red boxes indicate results displayed in Figure 3.

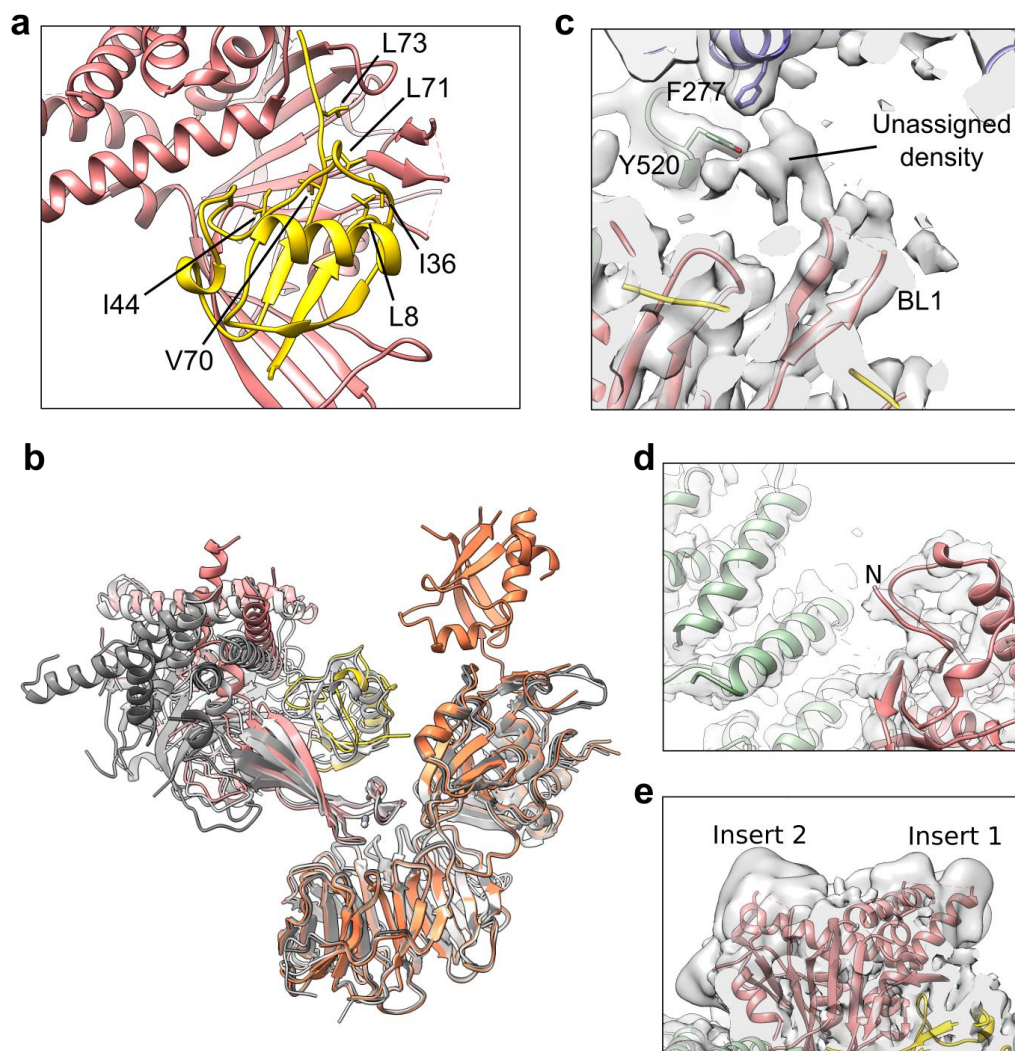

**Supplementary Figure S4.** The structure of USP1-UAF1 when bound to FANCI-FANCD2<sup>Ub</sup>. (a) The USP1-ubiquitin interface. Residues of the hydrophobic patch of ubiquitin are highlighted. (b) Alignment of

USP1-UAF1 structures by the UAF1 subunit. The ubiquitin-free (dark gray) and ubiquitin-bound (light gray) crystal structures, and the FANCI-FANCD2<sup>Ub</sup>-bound cryo-EM structure (colored) are shown. (c) An unassigned blob of density is present adjacent to FANCI, FANCD2 and the BL1 of USP1. The locally filtered map is shown at a threshold of 0.07. (d) The N-terminus of USP1 is not well resolved. The DeepEMhancer map is shown at a threshold of 0.1. (e) Inserts 1 and 2 of USP1 are not well resolved. The locally filtered map is shown at a threshold of 0.02.

**Supplementary Table S1.** Crystallography data collection and model refinement statistics<sup>a</sup>

|                                           | Ubiquitin-free USP1-UAF1                                                                             | Ubiquitin-bound USP1-UAF1                 |
|-------------------------------------------|------------------------------------------------------------------------------------------------------|-------------------------------------------|
| <b>Data collection and processing</b>     |                                                                                                      |                                           |
| Beamline                                  | DLS I04                                                                                              | DLS I04                                   |
| Wavelength (Å)                            | 0.9795                                                                                               | 0.9795                                    |
| Unit cell                                 | a=b=119.57 Å, c=195.46 Å                                                                             | a=b=134.24 Å, c=274.67 Å                  |
|                                           | $\alpha=\beta=\gamma=90^\circ$                                                                       | $\alpha=\beta=90^\circ, \gamma=120^\circ$ |
| Space group                               | P4 <sub>1</sub>                                                                                      | P6 <sub>5</sub>                           |
| Resolution range (Å)                      | 84.549 – 3.602 (3.754 – 3.602)                                                                       | 91.56 – 3.20 (3.31 – 3.20)                |
| Ellipsoidal resolution (Å)<br>(direction) | 4.312 (0.902 a* + 0.433 b*)<br>4.381 (0.879 a* + 0.476 b*)<br>3.601 (0.246 a* + 0.469 b* + 0.848 c*) | N.A.                                      |
| Unique reflections                        | 25470 (1264)                                                                                         | 46123 (4501)                              |
| Multiplicity                              | 5.7 (5.4)                                                                                            | 10.5 (10.1)                               |
| Completeness (%)                          |                                                                                                      |                                           |
| Spherical                                 | 80.3 (34.2)                                                                                          | 100 (100)                                 |
| Ellipsoidal                               | 95.0 (100)                                                                                           | N.A.                                      |
| Mean I/sig(I)                             | 6.4 (1.7)                                                                                            | 11.6 (1.7)                                |
| Wilson B-factor (Å <sup>2</sup> )         | 102.7                                                                                                | 62.8                                      |
| R <sub>meas</sub>                         | 0.258 (1.698)                                                                                        | 0.193 (1.657)                             |
| R <sub>pim</sub>                          | 0.108 (0.727)                                                                                        | 0.059 (0.519)                             |

|                                       |                                                                   |                                                                   |
|---------------------------------------|-------------------------------------------------------------------|-------------------------------------------------------------------|
| CC <sub>1/2</sub>                     | 0.992 (0.565)                                                     | 0.997 (0.581)                                                     |
| <b>Refinement</b>                     |                                                                   |                                                                   |
| R <sub>work</sub> / R <sub>free</sub> | 0.235 / 0.266                                                     | 0.204 / 0.234                                                     |
| Number molecules in asymmetric unit   |                                                                   |                                                                   |
| USP1                                  | 2                                                                 | 2                                                                 |
| UAF1                                  | 2                                                                 | 2                                                                 |
| Ubiquitin                             | 0                                                                 | 2                                                                 |
| Disorder model                        | One TLS group per protein molecule + residual isotropic B-factors | One TLS group per protein molecule + residual isotropic B-factors |
| Bond length rmsd (Å)                  | 0.003                                                             | 0.004                                                             |
| Bond angle rmsd (°)                   | 0.808                                                             | 0.909                                                             |
| All-atom clashscore                   | 7.3                                                               | 3.9                                                               |
| Ramachandran plot                     |                                                                   |                                                                   |
| Outliers (%)                          | 0.51                                                              | 0.31                                                              |
| Favored (%)                           | 93.79                                                             | 95.91                                                             |
| Rotamer outliers (%)                  | 1.39                                                              | 0.07                                                              |
| PDB ID                                | 7AY0                                                              | 7AY2                                                              |

<sup>a</sup>Values in parentheses correspond to the highest resolution shell, apart from Ellipsoidal resolution

### Supplementary Table S2. Cryo-EM data collection and model refinement statistics

| Data collection and processing                  |            |
|-------------------------------------------------|------------|
| Microscope                                      | Cryoarm    |
| Detector                                        | DE64       |
| Magnification                                   | 120,000x   |
| Voltage (kV)                                    | 300        |
| Electron Dose (e <sup>-</sup> /Å <sup>2</sup> ) | 65         |
| CTF Estimated Defocus range (μm)                | 0.22 – 3.7 |

|                                       |           |
|---------------------------------------|-----------|
| Pixel Size (Å)                        | 1.015     |
| Symmetry imposed                      | C1        |
| Consensus map resolution (Å)          | 3.8       |
| FSC threshold                         | 0.143     |
| Map resolution range (Å) <sup>a</sup> | 3.6-10    |
| FSC threshold                         | 0.5       |
| EMDB ID                               | EMD-11934 |

---

### Refinement

---

|                                             |                                     |
|---------------------------------------------|-------------------------------------|
| Initial models used                         | 6VAF, 5K1A, ubiquitin-bound<br>USP1 |
| Map sharpening B-factor (Å <sup>2</sup> )   | 94.6                                |
| Correlation coefficient (mask) <sup>b</sup> | 0.83                                |
| Bond length rmsd (Å)                        | 0.006                               |
| Bond angle rmsd (°)                         | 0.973                               |
| All-atom clashscore                         | 9.1                                 |
| Ramachandran plot                           |                                     |
| Outliers (%)                                | 0.04                                |
| Favored (%)                                 | 93.61                               |
| Rotamer outliers (%)                        | 0.07                                |
| PDB ID                                      | 7AY1                                |

---

<sup>a</sup>1% and 99% quantiles

<sup>b</sup>Calculated in phenix

**Supplementary Movie S1.** Morph between FANCI-FANCD2<sup>Ub</sup> on its own (6VAF) and bound to USP1-UAF1. FANCD2 – green; FANCI – violet; ubiquitin – yellow; USP1-UAF1 – transparent.

**Supplementary Movie S2.** 3D variability of the cryo-EM dataset of USP1-UAF1-FANCI-FANCD2<sup>Ub</sup>. First eigenvector of variability in the dataset. Viewed from above with respect to Figure 2, with FANCD2 on the left hand side.

**Supplementary Movie S3.** 3D variability of the cryo-EM dataset of USP1-UAF1-FANCI-FANCD2<sup>Ub</sup>. Second eigenvector of variability in the dataset. Viewed from above with respect to Figure 2, with FANCD2 on the left hand side.
